# Supplementary material for: Improving critical care discharge summaries: a collaborative quality improvement project using PDSA
Source: PubMed Central journal article supplement — BMJ Qual Improv Rep. 2015 Apr 30;4(1):u203938.w3268. doi: 10.1136/bmjquality.u203938.w3268 (PMC4645923; doi:10.1136/bmjquality.u203938.w3268), 2015-04-30
Supplement: bmjqir-4-u203938-w3268-s2.pdf [file bmjqir-4-u203938-w3268-s2.pdf]

**Results tables****Table 1. Composite score of quality, accuracy and completeness of discharge summaries: Percentage of discharge summaries achieving the target of good to excellent**

| % <b><u>Achieving target</u></b> of good or excellent |      |                                    |      |
|-------------------------------------------------------|------|------------------------------------|------|
| <b>Nursing discharge summaries</b>                    |      | <b>Medical discharge summaries</b> |      |
| Audit 1: (May 2014)                                   | 70.2 | Audit 1: (May 2014)                | 97.4 |
| Audit 2: (July 2014)                                  | 82.1 | Audit 2: (July 2014)               | 83.3 |
| Audit 3: (Sept 2014)                                  | 70.1 | Audit 3: (Sept 2014)               | 88.5 |

**Table 2. Composite score of quality, accuracy and completeness of discharge summaries: Percentage of discharge summaries rated as 'poor' or 'somewhere between poor and good'**

| % <b><u>Not achieving target</u></b> (rated as 'poor' or 'somewhere between poor and good') |             |                              |                                    |             |                              |
|---------------------------------------------------------------------------------------------|-------------|------------------------------|------------------------------------|-------------|------------------------------|
| <b>Nursing discharge summaries</b>                                                          | <b>Poor</b> | <b>Between poor and good</b> | <b>Medical discharge summaries</b> | <b>Poor</b> | <b>Between poor and good</b> |
| Audit 1: (May 2014)                                                                         | 4.39        | 17.54                        | Audit 1: (May 2014)                | 0           | 2.63                         |
| Audit 2: (July 2014)                                                                        | 5.13        | 5.13                         | Audit 2: (July 2014)               | 0           | 7.69                         |
| Audit 3: (Sept 2014)                                                                        | 2.30        | 10.34                        | Audit 3: (Sept 2014)               | 0           | 6.90                         |

**Table 3. Percentage of discharge summaries missing and therefore not available for audit or to inform patient care**

| Percentage (%) of discharge summaries <b><u>missing</u></b> |      |                                    |     |
|-------------------------------------------------------------|------|------------------------------------|-----|
| <b>Nursing discharge summaries</b>                          |      | <b>Medical discharge summaries</b> |     |
| Audit 1: (May 2014)                                         | 7.9  | Audit 1: (May 2014)                | 0   |
| Audit 2: (July 2014)                                        | 2.9  | Audit 2: (July 2014)               | 5.9 |
| Audit 3: (Sept 2014)                                        | 17.2 | Audit 3: (Sept 2014)               | 0   |

**Table 4. Has the transferring nurse signed the nursing discharge summary?**

|                      | Percentage (%) |      |                           |                       |       |
|----------------------|----------------|------|---------------------------|-----------------------|-------|
|                      | Yes            | No   | Discharge summary missing | Question not answered | Total |
| Audit 1: (May 2014)  | 78.9           | 13.2 | 7.9                       | 0.0                   | 100   |
| Audit 2: (July 2014) | 82.4           | 11.8 | 2.9                       | 2.9                   | 100   |
| Audit 3: (Sept 2014) | 69.0           | 13.8 | 17.2                      | 0.0                   | 100   |

**Table 5. Has the receiving nurse signed the nursing discharge summary?**

|                      | Percentage (%) |      |                           |                       |       |
|----------------------|----------------|------|---------------------------|-----------------------|-------|
|                      | Yes            | No   | Discharge summary missing | Question not answered | Total |
| Audit 1: (May 2014)  | 28.9           | 63.2 | 7.9                       | 0.0                   | 100   |
| Audit 2: (July 2014) | 35.3           | 58.8 | 2.9                       | 2.9                   | 100   |
| Audit 3: (Sept 2014) | 24.1           | 58.6 | 17.2                      | 0.0                   | 100   |

**Table 6. Time taken by iMobile nurse to find and read the nursing and medical critical care discharge summaries in order to gather the information needed to review the patient**

|                      | Time in minutes |        |      |           |
|----------------------|-----------------|--------|------|-----------|
|                      | Mean            | Median | Mode | Range     |
| Audit 1: (May 2014)  | 11.2            | 10     | 10   | (5-25) 20 |
| Audit 2: (July 2014) | 7.7             | 10     | 10   | (1-15) 14 |
| Audit 3: Sept (2014) | 9.3             | 10     | 10   | (5-20) 15 |
